# Supplementary material
Source: MDPI journal article supplement (https://www.mdpi.com/1424-2818/12/10/383)

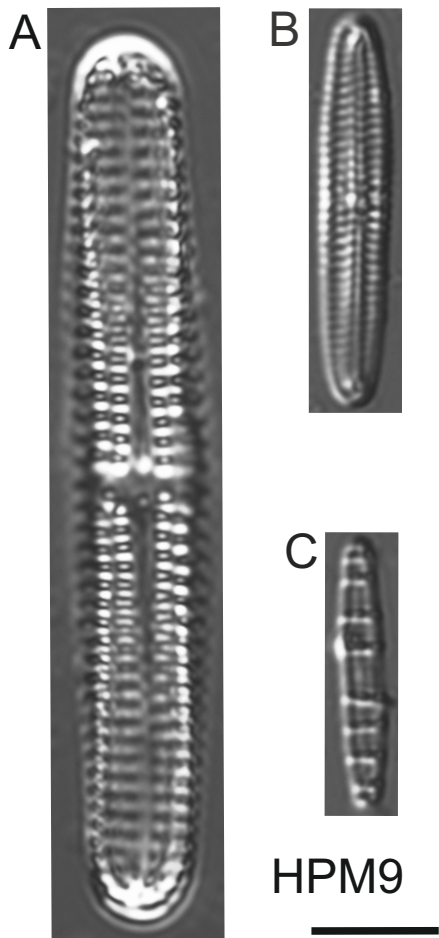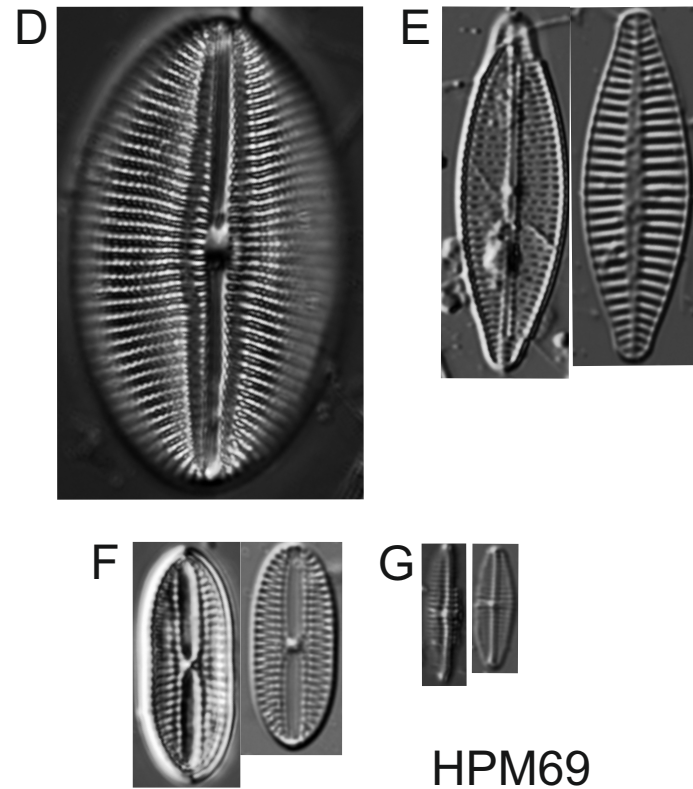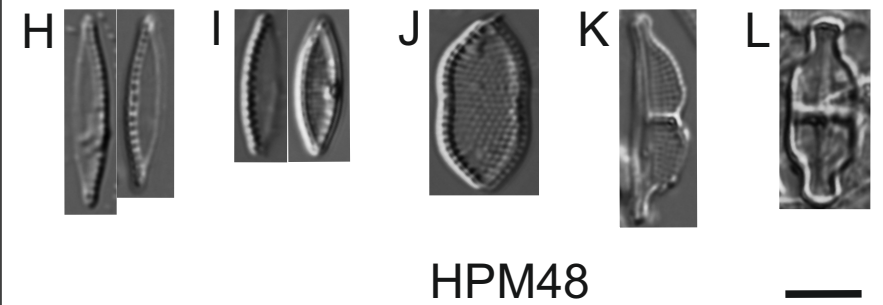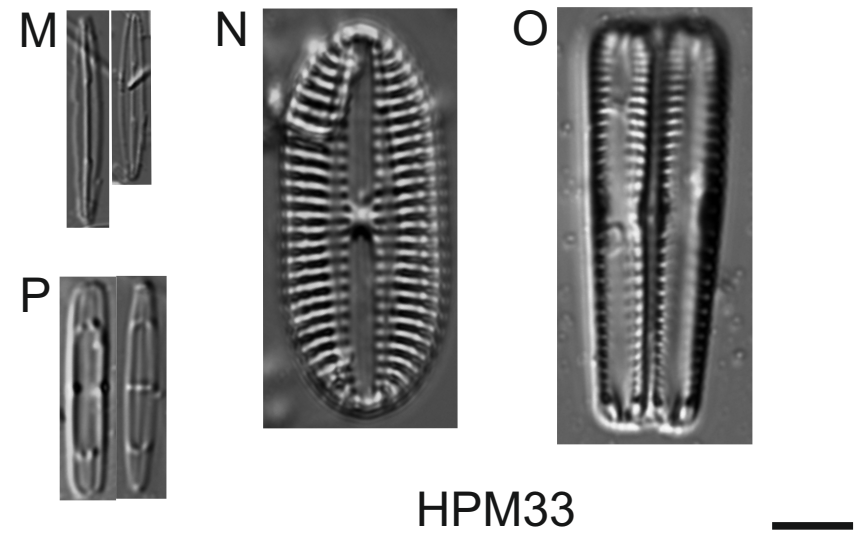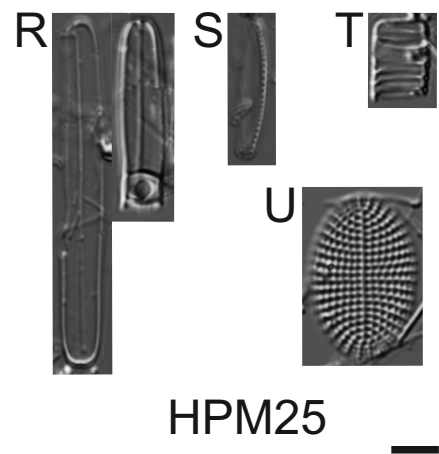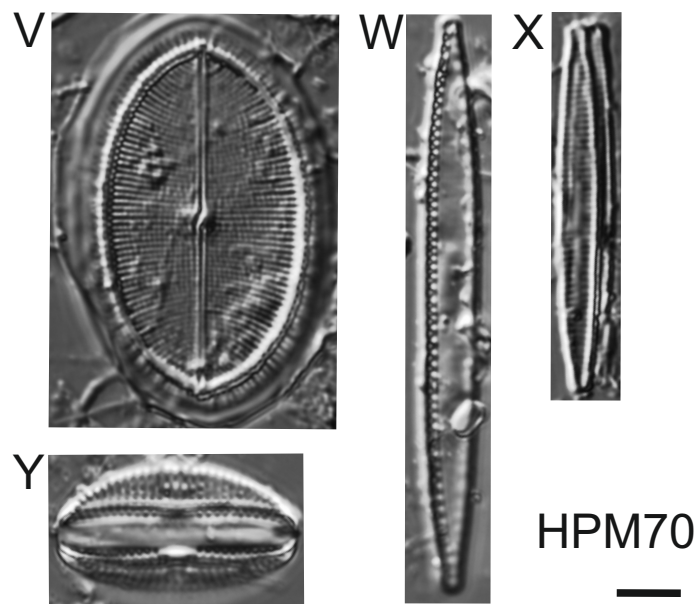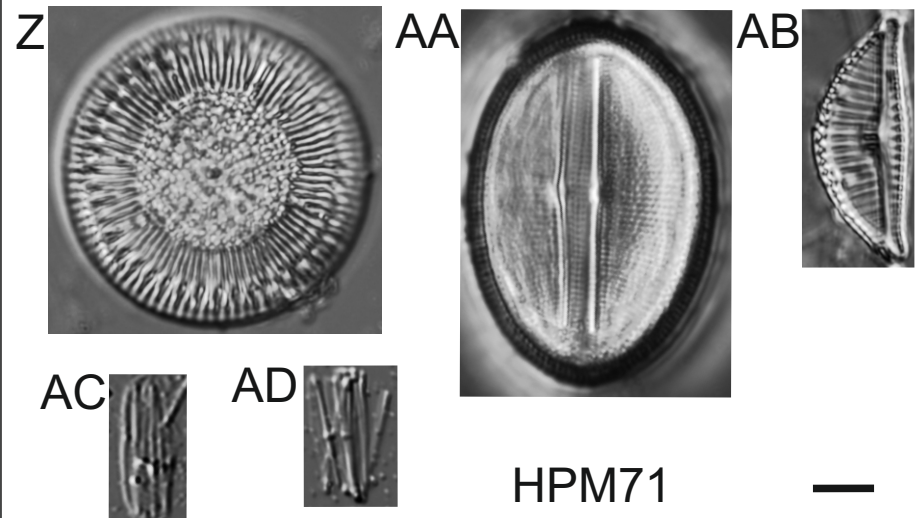

Supplement: s1 [file s1]

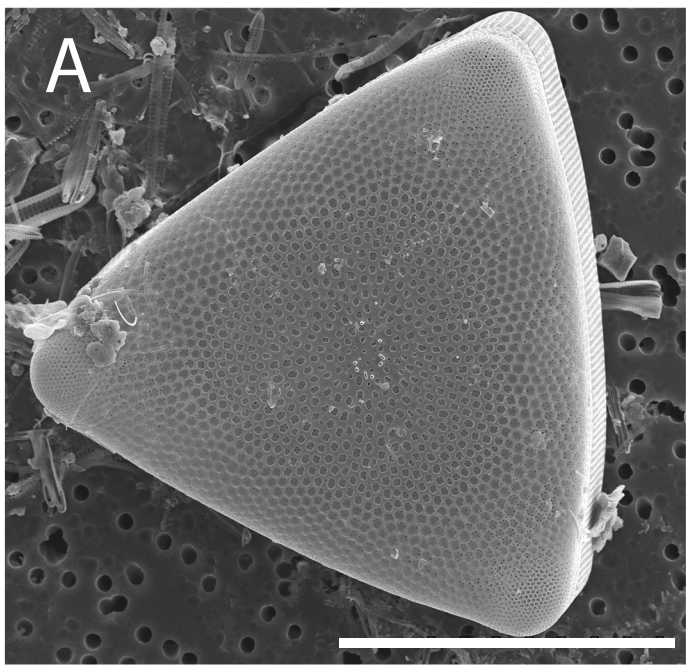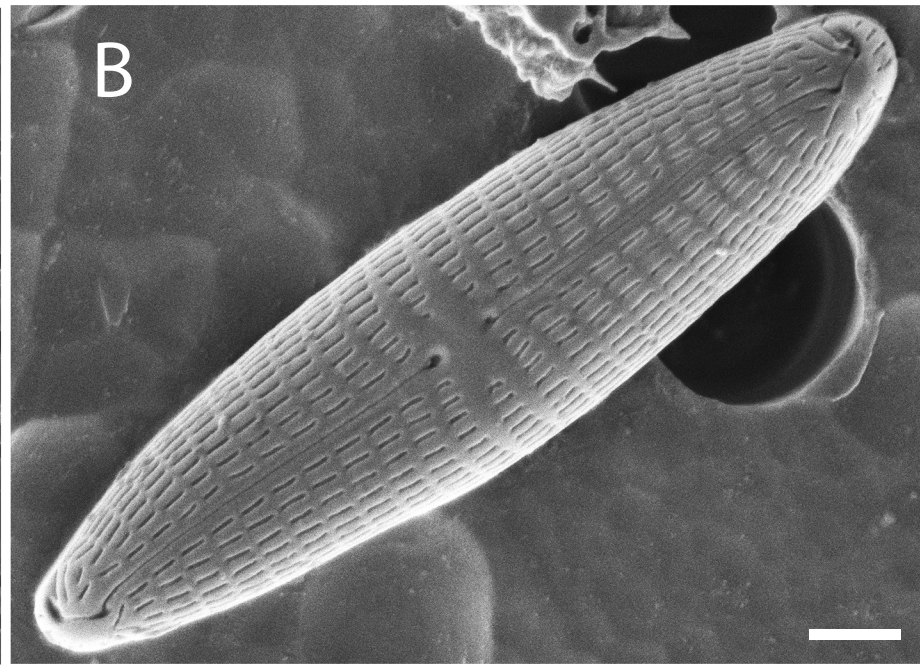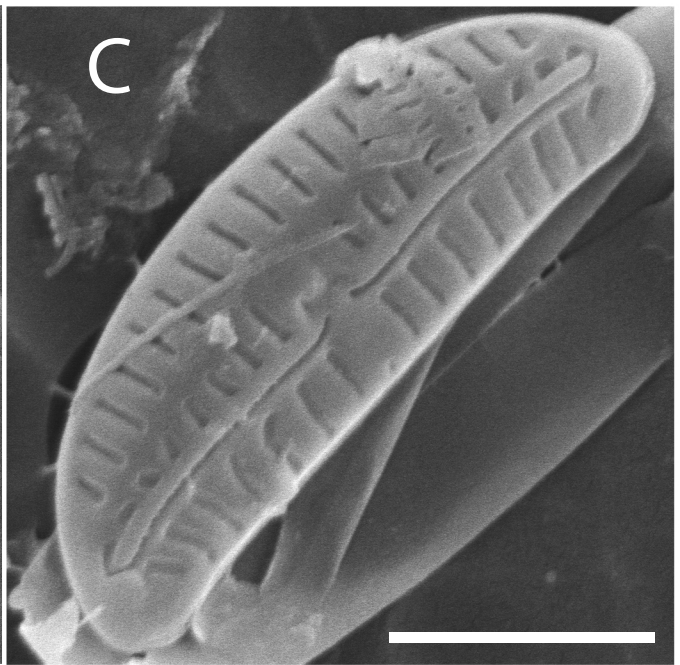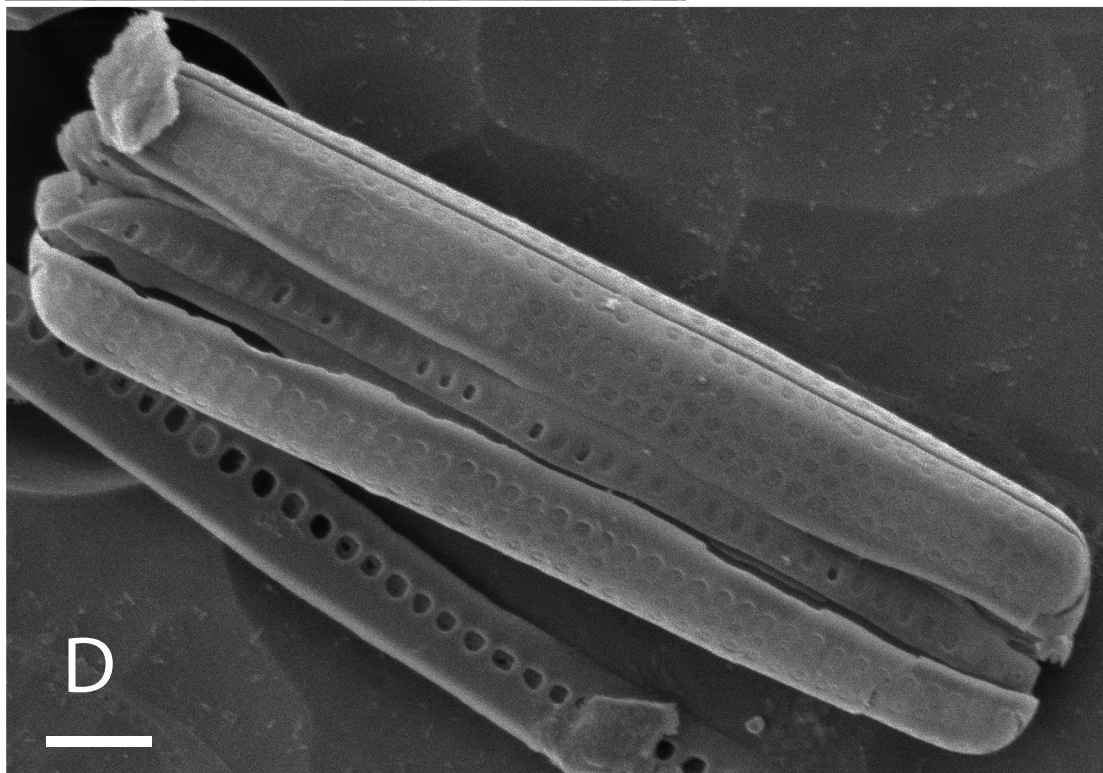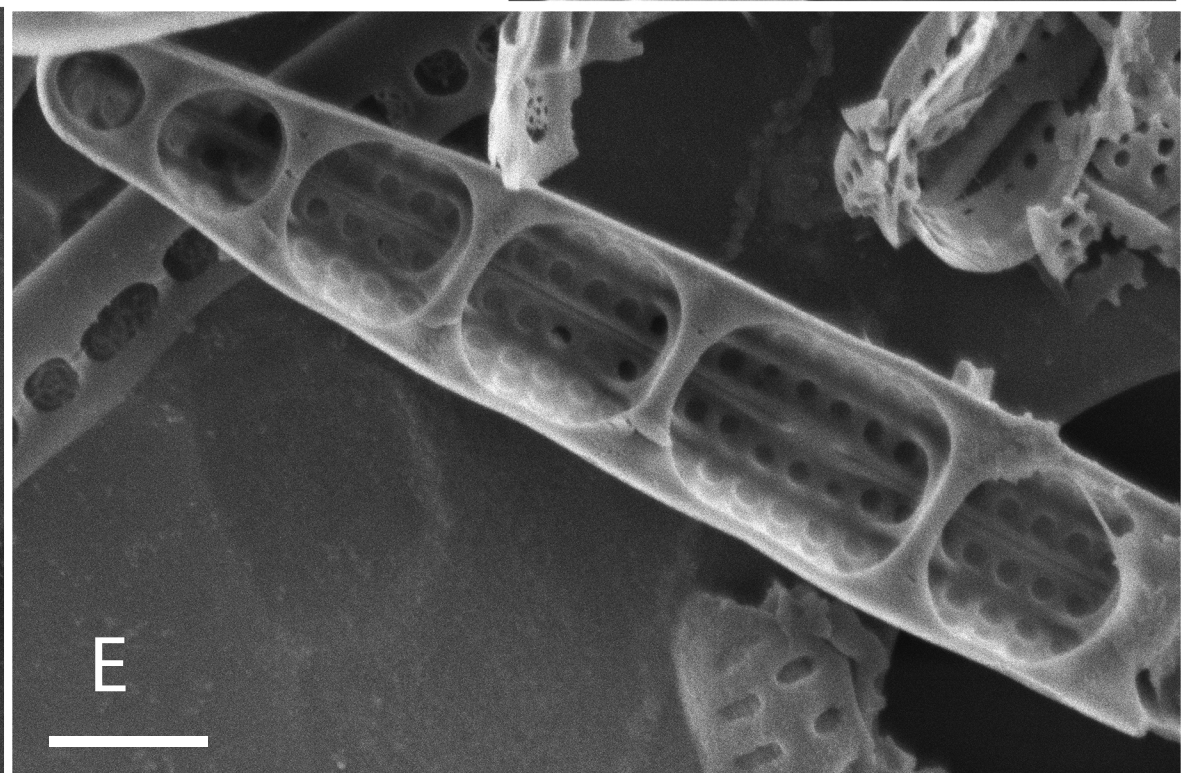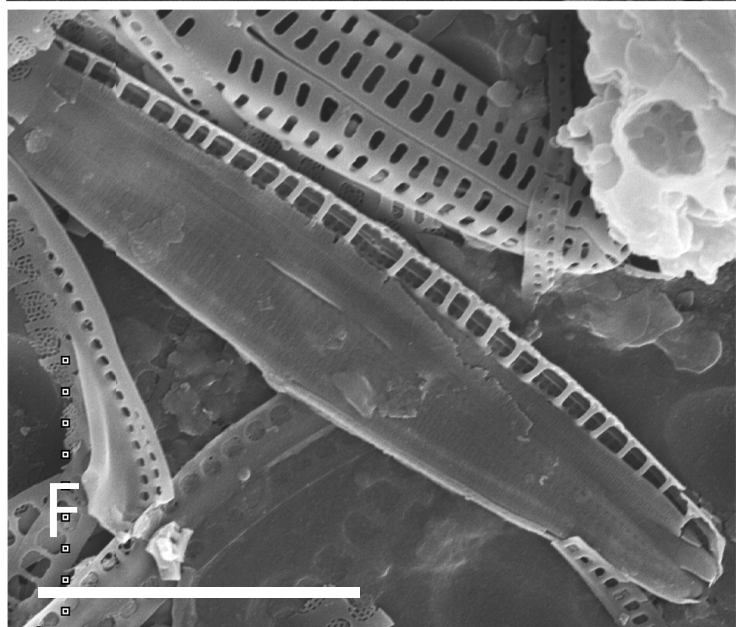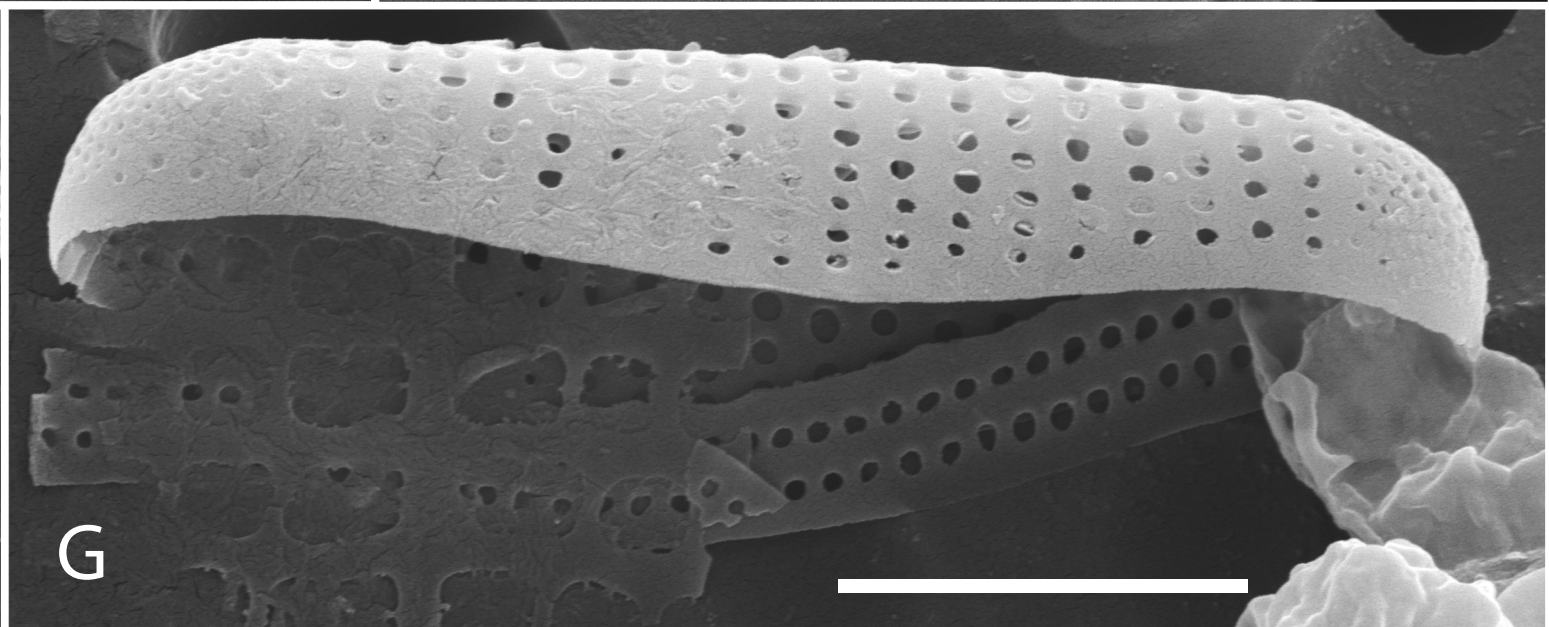

Supplement: s1 [file s1]
